# Supplementary material
Source: publisher figshare collection journal article supplement (https://tandf.figshare.com/articles/dataset/_/13013534)
Supplement: Supplementary file 1 [file 24813320]

1 **SUPPLEMENTARY MATERIAL**

2 **Hepatoprotective effect of total flavonoids from *Glycyrrhiza uralensis* Fisch in**  
3 **liver injury mice**

4

5 San-hu GOU, Miao HE, Bei-bei LI, Ning-yi ZHU and Jing-man Ni\*

6 *Institute of Pharmaceutics, School of Pharmacy, Lanzhou University, Lanzhou*  
7 *730000, P.R. China*

8

9 **Abstract**

10 This work aimed to investigate the hepatoprotective effect of total flavonoids from  
11 *Glycyrrhiza uralensis*. The main compounds in licorice total flavonoids (LTF) were  
12 isolated from *Glycyrrhiza uralensis* and their total content of were more than 60%.  
13 Hepatoprotective effects of LTF were investigated in three kinds of hepatic injury  
14 mice model induced by high-fat emulsion, Chinese liquor, and tetrachloromethane.  
15 Serum ALT, AST, and ALP levels and hepatic MDA, TG, cholesterol, and  
16 hydroxyproline of hepatic injury mice were reduced by LTF. Simultaneously, hepatic  
17 SOD and glutathione were increased by LTF. These results suggested that LTF can  
18 repair liver tissue and reduce hepatic injury via alleviating inflammation, improving  
19 antioxidant enzyme activity, and reducing oxidative stress in liver tissue and it may be  
20 a valuable natural source of hepatoprotective activity.

21 **Keywords:** Alcoholic liver; Flavonoid; Glycyrrhiza; Hepatic fibrosis; Liver injury;  
22 NAFLD

23

## 24 **Experimental**

### 25 *Plant materials*

26 Licorice is identified as *Glycyrrhiza uralensis* Fisch and harvested from  
27 *Glycyrrhiza* Planting Base in Jiuquan of China. The specimen number is  
28 LZUYJ-201506.

### 29 *Experimental materials*

30 PPC Capsules were produced by Sinofi Beijing Pharmaceutical Co., Ltd. Silybin  
31 Capsules were produced by Tasly Pharmaceutical Co., Ltd. Colchicine Tablets were  
32 produced by Xi-Shuang-Ban-Na Pharmaceutical Co., Ltd. 56° Er-Guo-Tou liquor was  
33 produced by Beijing Red Star Co., Ltd. Peanut oil was produced by Shandong Luhua  
34 Co., Ltd. Alanine aminotransferase (ALT), aspartate aminotransferase (AST), alkaline  
35 phosphatase (ALP), triglyceride (TG), free fatty acid (FFA), total cholesterol (TC),  
36 superoxide dismutase (SOD), glutathione (GSH), malondialdehyde (MDA), and  
37 hydroxyproline (Hyp) diagnostic kits were purchased from Nanjing Jiancheng  
38 Bioengineering.

### 39 *Preparation of LTF and separation of main compounds in LTF*

40 In our previous study, the 95% ethanol extracts from *G. uralensis* were subjected to  
41 polyamide columns (60-80 mesh, 100×1500mm), and the hydrochloric  
42 acid-magnesium reaction was used to detect the flavonoids in the fractions. The  
43 lyophilized and collected licorice flavonoids powder were LTF. Sephadex LH-20 and  
44 silica gel column chromatography were used to separate LTF. Six major flavonoids  
45 monomers and one flavonoid-like coumarin compound were successfully isolated and  
46 their content in LTF was determined by reversed-phase HPLC.

### 47 *Establishment of liver injury mice models and treatment approaches*

48 All experiments involving animals were performed according to protocols

49 approved by the Animal Care and Use Committee of Lanzhou University. Animals  
50 were maintained in a temperature- and light-controlled facility and fed normal chow.  
51 Male Kunming mice aged 8 weeks and weighted  $20 \pm 2$  g were purchased from the  
52 Lanzhou University (laboratory animal certificate: scxk2013-0002). 180 mice were  
53 fed ad libitum for 5 days and randomly divided into 3 big groups (60 mice were in  
54 each big group), which were high-fat emulsion-induced fatty liver group, Chinese  
55 liquor-induced alcohol liver group, and CCl<sub>4</sub>-induced liver fibrosis group, respectively.  
56 Each big group was divided into 6 small groups, which were normal control group,  
57 model control group, positive control group and low (87.5 mg/kg), medium (175  
58 mg/kg), and high (350 mg/kg) dose of LTF treatment group, respectively. Mice were  
59 treated with interventional LTF for 4 weeks after 6 weeks of modeling. The specific  
60 modeling methods of the three liver injury models are as follows:

61 1) NAFLD of mice was induced by orally administered with high-fat emulsion (1 g  
62 of propylthiouracil, 10 g of cholesterol, 2 g of sodium cholate, 20 g of lard, 10 mL of  
63 peanut oil, 5 mL of Tween-80 in 100 mL Water solution) at a dose of 10 mL/kg body  
64 weight. After 6 weeks of modeling, the mice were treated with interventional LTF for  
65 4 weeks. PPC (100 mg/kg) was used to control positive drug.

66 2) The mice alcoholic liver was induced by 56° red star Er-Guo-Tou (a Chinese  
67 liquor). The mice were orally administered with starting dose from 5 mL/kg body  
68 weight at am 9:00 daily, subsequently, increasing dose 1 mL/kg every two days until  
69 to 10 mL/kg. After 6 weeks of modeling, the mice were treated with interventional  
70 LTF for 4 weeks. Silybin (100 mg/kg) was used to positive control drug.

71 3) 15% CCl<sub>4</sub>/ peanut oil solution (v/v, 10 mL/kg body weight, every 5 days) were  
72 subcutaneously injected into the back (We did not choose intraperitoneal injection  
73 because the mouse will scratch the abdomen and cause its inflammation and  
74 ulceration) to induce mice liver fibrosis. After 6 weeks of modeling, the mice were  
75 treated with interventional LTF for 4 weeks. Colchicine (45 mg/kg) was used to  
76 positive drug.

77 After 10 weeks, overnight fasting plasma samples, organs and tissues were  
78 collected.

#### 79 *Calculation of liver weight index*

80 After all the mice sacrificed, the liver tissues were taken out and washed with saline.  
81 The surface water of liver was dried with a filter paper, and then livers were weighed.  
82 The liver index is calculated as liver weight index = liver weight/ body weight ×  
83 100%.

#### 84 *Determination of indicators of liver injury in serum*

85 Serum samples were prepared to measure biochemical parameters. Briefly, the  
86 blood samples were allowed to clot at 4 °C and centrifuged at 5,000 × g for 10 min.  
87 The serum samples were collected and stored at -20 °C until assayed. The kits for the  
88 analyses of serum ALT, AST, ALP, TG, FFA, and TC were conducted according to the  
89 manufacturer's instructions using a spectrophotometric plate reader.

#### 90 *Determination of indicators of liver injury in the liver*

91 Liver tissue homogenate in saline were prepared to measure biochemical  
92 parameters. 1 g of mouse liver tissue was placed into tube 4 mL of pre-cooled saline  
93 and smashed by homogenizer in an ice bath. After diluting liver tissue suspension to  
94 0.1 g/mL of concentration, liver tissue suspensions were centrifuge at 3000 rpm for 15  
95 min at 4 °C to obtain liver tissue homogenate. The samples were collected and stored  
96 at -80 °C until assayed. The kits for the analyses of liver tissue SOD, GSH, MDA,  
97 Hyp, TG, and TC were conducted according to the manufacturer's instructions using a  
98 spectrophotometric plate reader.

#### 99 *Histopathological examination of the liver*

100 The mouse liver tissues were fixed in 10% neutral formalin solution. Then, liver  
101 tissues were dehydrated and embedded in paraffin, which was sectioned 4-6 μm and  
102 stained with hematoxylin-eosin (HE). Fibrosis and inflammation of liver tissue were

103 observed under a light microscope (Olympus CX21, Takachiho, Japan). The relative  
104 area of hepatic fat vacuoles of mice induced by high-fat emulsion, the relative area of  
105 hepatic steatosis and edema of mice induced by Chinese liquor, and relative area of  
106 liver fibrosis induced by CCl<sub>4</sub> were calculated using Adobe Photoshop CC 2017  
107 software.

#### 108 *Statistical analysis*

109 All the analyses were carried out in triplicate, and the results were expressed as  
110 mean ± standard deviation (SD). The quantitative data were analyzed using the  
111 one-way analysis of variance (ANOVA) and the GraphPad Prism 5.0 program. The  
112 significance level was set at  $P < 0.05$  and  $P < 0.01$ .

### 113 **Results and discussion**

#### 114 *Liver biochemical indicators*

115 As shown in Table S3, hepatic MDA, TC, and TG in NAFLD mice were  
116 significantly higher than normal mice. 175 and 350 mg/kg of LTF could effectively  
117 reduce hepatic MDA and TC in NAFLD mice. In the LTF treatment group, hepatic  
118 TG was significantly decreased. Hepatic MDA and TG in NAFLD mice can be  
119 reduced more greatly by LTF than PPC. LTF also can significantly reduce hepatic  
120 cholesterol and TG in NAFLD mice induced by high-fat emulsion.

121 As shown in Table S4, in Chinese liquor-induced alcoholic liver experiment,  
122 compared with normal mice, hepatic MDA and TG were significantly increased ( $P <$   
123  $0.01$ ), and hepatic GSH and SOD activities were significantly decreased ( $P < 0.01$ ) in  
124 Chinese liquor-induced alcoholic liver mice. The 87.5 mg/kg of LTF had no  
125 significant effect on hepatic MDA ( $P > 0.05$ ), while 175 and 350 mg/kg of LTF can  
126 significantly reduce the hepatic MDA in alcoholic liver mice ( $P < 0.01$ ). Hepatic TG  
127 was decreased by LTF while hepatic SOD and GSH were increased in alcoholic liver  
128 mice. LTF had a more markedly up-regulation effect on these biochemical factors  
129 than Silybin in alcoholic liver mice.

130 As shown in Table S5, compared with normal mice, hepatic GSH and SOD in  
131 hepatic fibrosis mice were significantly decreased ( $P < 0.01$ ). Hepatic Hyp, TG, and  
132 MDA were significantly after CCl<sub>4</sub>-induced. After treatment by LTF. Hepatic Hyp and  
133 TG were dramatically reduced by LTF. However, only 175 and 350 mg/kg of LTF  
134 exhibited a certain moderating effect on hepatic MDA, SOD, and GSH.

#### 135 *Morphological and histopathological examination of the liver*

136 Hepatocytes radially arranged and their nuclear structure was clear, and hepatic  
137 tissue was not infiltrated by inflammatory cells and edema cells in normal mice  
138 (Figure S5-5A).

139 After 10 weeks of inducing with high-fat emulsion, the hepatocytes of mice  
140 exhibited obvious fatty degeneration and disorderly arranged. However, they did not  
141 have obvious necrosis cells and pyknosis or disappearance of the partial nucleus  
142 (Figure S5B). After treated by PPC, the hepatic nucleus was stained dark and the cell  
143 gap was obviously enlarged (Figure S5C). The low-dose LTF treated-mice had no  
144 obvious hepatic steatosis, but they still exhibited intracellular edema (Figure S5D).  
145 the medium-dose LTF treated-mice showed no obvious fatty degeneration and their  
146 hepatocytes edemas were improved significantly (Figure S5E). The hepatic tissue  
147 morphology of high-dose LTF treated-mice was significantly approached to normal.  
148 Their cells were close to the hepatocytes and had no obvious cell edema and fatty  
149 degeneration (Figure S5F). 100 mg/kg of PPC and 87.5, 175, and 350 mg/kg of LTF  
150 can reduce relative areas of hepatic fat vacuoles by 82.32, 73.68, 79.53, and 85.14%,  
151 respectively (Figure S5G).

152 After 10 weeks of inducing with Chinese liquor, liver tissue of mice shown marked  
153 edema and fatty degeneration, while hepatocytes lines disorderly arranged and cell  
154 nucleus with inflammatory infiltration were disappeared (Figure S5B). Liver tissue  
155 morphology of mice treated with silybin approached to normal (Figure S5C). The  
156 hepatic steatosis was significantly reduced by low-dose LTF, but some steatosis was  
157 still shown (Figure S5D). Medium-dose LTF treated-mice did not exhibit obvious

158 steatosis. Hepatic cords orderly arranged and hepatocyte shapes were normal (Figure  
159 S5E). Hepatocyte morphology of high-dose LTF treated-mice was better than the  
160 untreated model mice. 100 mg/kg of silybin and 87.5, 175, and 350 mg/kg of LTF can  
161 reduce relative area of hepatic steatosis and edema by 82.65, 73.66, 82.72, and  
162 79.89%, respectively (Figure S5G).

163 After 10 weeks of inducing with CCl<sub>4</sub>, the hepatic portal area of model mice had  
164 massive fibrotic hyperplasia and the hepatic cords disorderly arranged. Hepatocytes  
165 had obvious fibrosis, steatosis, and inflammatory cell infiltration (Figure S6B). The  
166 liver nucleus of mice treated with colchicine became larger and the cell boundaries  
167 were blurred compared with normal mice, but the cells were not shown obvious  
168 fibrosis (Figure S6C). Liver pathology was apparently improved after low-dose LTF  
169 treatment, but the fibrosis near the central vein was still observed (Figure S6D).  
170 Medium-dose LTF treated-mice had no obvious steatosis, and the hepatic cords  
171 orderly arranged. However, some small ranges of fibrosis were observed in the central  
172 venous area (Figure S6E). High-dose LTF visibly suppressed the steatosis, and hepatic  
173 tissue morphologies were closed to the normal group mice, but some cells edemas  
174 were still observed (Figure S6F). 45 mg/kg of colchicine and 87.5, 175, and 350  
175 mg/kg of LTF can reduce the relative area of liver fibrosis by 77.24, 68.7, 58.02, and  
176 81.12%, respectively (Figure S6G).

177 **Table S1. Monomeric compounds isolated from total flavonoids of licorice and their content.**

| No. | Compound        | Content |
|-----|-----------------|---------|
| 1   | Neoliquiritin   | 15.74%  |
| 2   | Liquiritin      | 22.55%  |
| 3   | Liquiritigenin  | 3.33%   |
| 4   | Glycycomarin    | 11.74%  |
| 5   | Isolicoflavonol | 2.41%   |
| 6   | Licochalcone A  | 4.23%   |
| 7   | Medicarpin      | 1.52%   |

178



179 **Table S2. Effects of LTF on hepatic MDA, Cholesterol and TG of mice induced by high-fat**  
 180 **emulsion.**

| Group | MDA<br>(nmol/g)               | Cholesterol<br>(mmol/g)         | TG<br>( $\mu$ mol/g)             |
|-------|-------------------------------|---------------------------------|----------------------------------|
| NC    | 1.76 $\pm$ 0.20               | 0.091 $\pm$ 0.008               | 50.13 $\pm$ 8.24                 |
| MC    | 2.38 $\pm$ 0.22 <sup>**</sup> | 0.115 $\pm$ 0.020 <sup>**</sup> | 188.21 $\pm$ 16.13 <sup>**</sup> |
| PC    | 2.04 $\pm$ 0.13 <sup>††</sup> | 0.080 $\pm$ 0.039 <sup>†</sup>  | 131.43 $\pm$ 14.45 <sup>††</sup> |
| L-LTF | 2.25 $\pm$ 0.16               | 0.113 $\pm$ 0.012               | 166.22 $\pm$ 17.32 <sup>††</sup> |
| M-LTF | 2.12 $\pm$ 0.16 <sup>††</sup> | 0.100 $\pm$ 0.006 <sup>†</sup>  | 147.33 $\pm$ 10.78 <sup>††</sup> |
| H-LTF | 1.99 $\pm$ 0.05 <sup>††</sup> | 0.096 $\pm$ 0.016 <sup>†</sup>  | 128.45 $\pm$ 12.35 <sup>††</sup> |

181 **Notes:** The data was indicated by mean  $\pm$  SD, n=10, <sup>\*</sup>*P* < 0.05 and <sup>\*\*</sup>*P* < 0.01, compared with  
 182 normal control group. <sup>†</sup>*P* < 0.05 and <sup>††</sup>*P* < 0.01, compared with model control group. MDA,  
 183 malondialdehyde. TG, triglyceride. NC, Normal control group. MC, Model control group. PC,  
 184 Positive drugs (Polyene phosphatidylcholine, 100 mg/kg) treatment group. L, M and H-LTF, low  
 185 (87.5 mg/kg), medium (175 mg/kg) and high (350 mg/kg) dose LTF treatment groups.

186 **Table S3. Effects of LTF on hepatic MDA, SOD, GSH and TG of mice induced by Chinese**  
 187 **liquor.**

| Group | MDA<br>(nmol/g)               | SOD<br>(U/mg)                    | GSH<br>( $\mu$ mol/g)          | TG<br>( $\mu$ mol/g)             |
|-------|-------------------------------|----------------------------------|--------------------------------|----------------------------------|
| NC    | 1.26 $\pm$ 0.13               | 238.06 $\pm$ 12.15               | 14.66 $\pm$ 3.20               | 47.20 $\pm$ 6.99                 |
| MC    | 3.82 $\pm$ 1.25 <sup>**</sup> | 133.53 $\pm$ 3.98 <sup>**</sup>  | 7.92 $\pm$ 1.04 <sup>**</sup>  | 154.97 $\pm$ 25.72 <sup>**</sup> |
| PC    | 1.96 $\pm$ 0.32 <sup>††</sup> | 214.74 $\pm$ 10.84 <sup>††</sup> | 12.89 $\pm$ 0.98 <sup>††</sup> | 106.37 $\pm$ 17.11 <sup>†</sup>  |
| L-LTF | 3.52 $\pm$ 1.29               | 183.58 $\pm$ 17.13 <sup>††</sup> | 9.69 $\pm$ 0.81 <sup>†</sup>   | 124.56 $\pm$ 11.3 <sup>†</sup>   |
| M-LTF | 2.44 $\pm$ 0.82 <sup>††</sup> | 183.71 $\pm$ 14.43 <sup>††</sup> | 10.92 $\pm$ 1.16 <sup>††</sup> | 92.60 $\pm$ 13.76 <sup>††</sup>  |
| H-LTF | 1.94 $\pm$ 0.79 <sup>††</sup> | 195.01 $\pm$ 19.71 <sup>††</sup> | 12.94 $\pm$ 1.04 <sup>††</sup> | 92.22 $\pm$ 8.50 <sup>††</sup>   |

188 **Notes:** The data was indicated by mean  $\pm$  SD, n=10, \**P* < 0.05 and \*\**P* < 0.01, compared with  
 189 normal control group. <sup>†</sup>*P* < 0.05 and <sup>††</sup>*P* < 0.01, compared with model control group. MDA,  
 190 malondialdehyde. SOD, superoxide dismutase. GSH, glutathione. TG, triglyceride. NC, Normal  
 191 control group. MC, Model control group. PC, Positive drugs (Silybin, 100 mg/kg) treatment group.  
 192 L, M and H-LTF, Low (87.5 mg/kg), medium (175 mg/kg) and high (350 mg/kg) dose LTF  
 193 treatment groups.

194 **Table S4. Effects of LTF on hepatic Hyp, MDA, GSH, SOD and TG of mice induced by CCl<sub>4</sub>.**

| Group | Hyp<br>(mg/g) | MDA<br>(nmol/g) | SOD<br>(U/mg)  | GSH<br>(μmol/g) | TG<br>(μmol/g) |
|-------|---------------|-----------------|----------------|-----------------|----------------|
| NC    | 10.28±3.74    | 1.56±0.48       | 148.69±57.18   | 7.91±3.95       | 48.23±14.84    |
| MC    | 17.84±1.96**  | 3.45±1.09**     | 98.94±19.19*   | 4.02±1.66*      | 106.67±33.70** |
| PC    | 12.47±2.43††  | 1.68±0.46††     | 146.44±21.57†† | 7.29±3.00†      | 51.64±14.22††  |
| L-LTF | 14.91±2.45†   | 2.85±0.79       | 109.00±30.85   | 5.30±1.79       | 77.61±12.99†   |
| M-LTF | 13.84±4.73†   | 1.72±0.37††     | 136.22±45.91†  | 6.29±2.44†      | 53.18±11.44††  |
| H-LTF | 13.22±2.91††  | 1.58±0.71††     | 139.44±24.35†† | 6.34±2.21†      | 49.47±22.57††  |

195 **Notes:** The data was indicated by mean ± SD, n=10, \**P* < 0.05 and \*\**P* < 0.01, compared with  
196 normal control group. †*P* < 0.05 and ††*P* < 0.01, compared with model control group. Hyp,  
197 hydroxyproline. MDA, malondialdehyde. SOD, superoxide dismutase. GSH, glutathione. TG,  
198 triglyceride. NC, Normal control group. MC, Model control group. PC, Positive drugs (Colchicine  
199 45 mg/kg) treatment group. L, M and H-LTF, Low (87.5 mg/kg), medium (175 mg/kg) and high  
200 (350 mg/kg) dose LTF treatment groups.

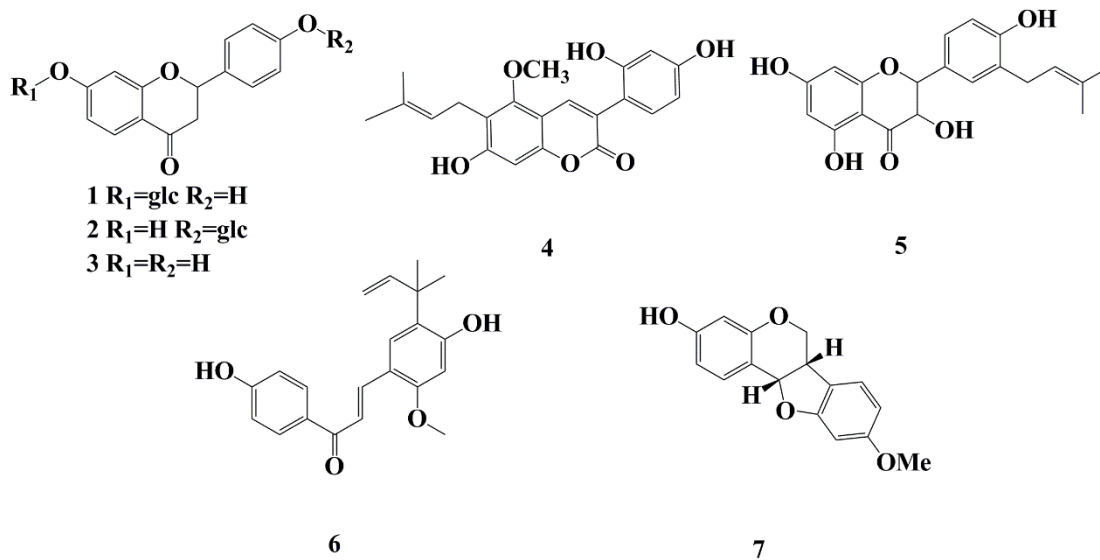

201

202 **Figure S1:** Monomeric compounds in licorice total flavonoids. 1. Neoliquiritin. 2.

203 Liquiritin. 3. Liquiritigenin. 4. Glycycomarin. 5. Isolicoflavonol. 6. Licochalcone A.

204 7. Medicarpin.

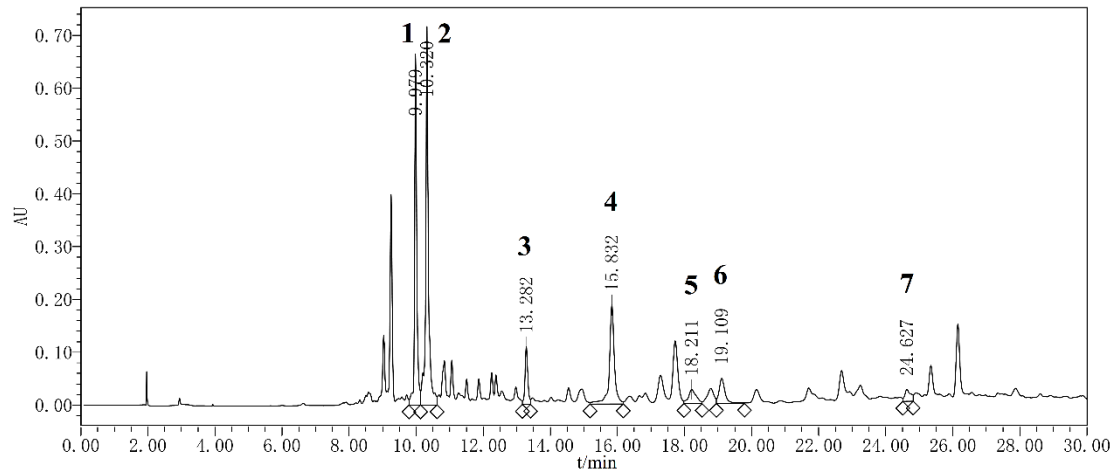

205

206 **Figure S2:** The HPLC peaks positions of monomeric compounds isolated from in

207 licorice total flavonoids. **1.** Neoliquiritin. **2.** Liquiritin. **3.** Liquiritigenin. **4.**

208 Glycycomarin. **5.** Isolicoflavonol. **6.** Licochalcone A. **7.** Medicarpin.

209

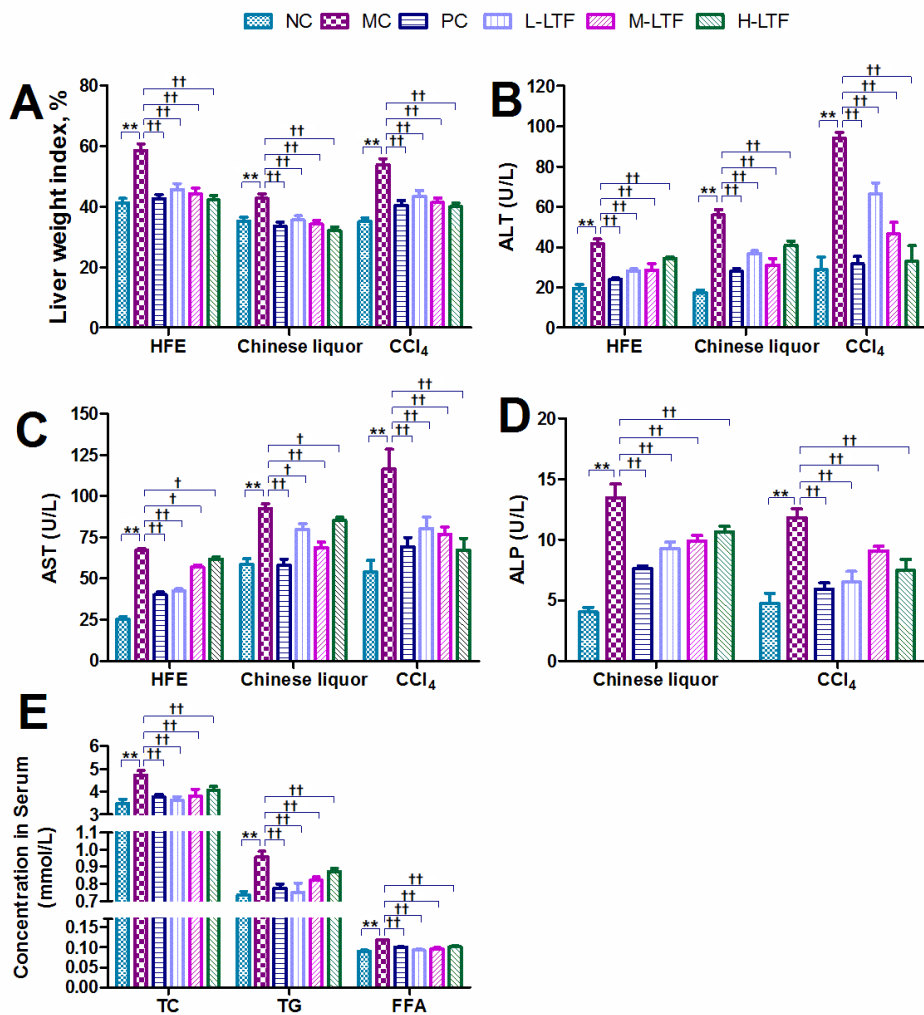

210

211 **Figure S3:** Effects of LTF on liver weight index and serum biochemical indicators in  
 212 mice for 4 weeks. (A) Liver weight index= liver weight/body weight. (B) Serum ALT  
 213 levels of mice. (C) Serum AST levels of mice. (D) Serum ALP levels of mice. (E)  
 214 Serum TC, TG, and FFA levels of mice induced by high-fat emulsion. Data is  
 215 represented by mean  $\pm$  SD,  $n=10$ ,  $*P < 0.05$  and  $**P < 0.01$ , compared with normal  
 216 control group.  $\dagger P < 0.05$  and  $\dagger\dagger P < 0.01$ , compared with model control group. ALT,  
 217 Alanine aminotransferase. AST, Aspartate aminotransferase. ALP, Alkaline  
 218 phosphatase. TC, Total Cholesterol. TG, Triglyceride. FFA, Free fatty acid. HFE,  
 219 High-fat emulsion. NC, Normal control group. MC, Model control group. PC,  
 220 Positive drugs (NAFLD mice induced by high-fat emulsion were used polyene  
 221 phosphatidylcholine, Alcoholic liver mice induced by Chinese liquor were used

222 silybin and liver fibrosis mice induced by CCl<sub>4</sub> were used colchicine) treatment group.

223 L, M and H-LTF, low (87.5 mg/kg), medium (175 mg/kg) and high (350 mg/kg) dose

224 LTF treatment groups.

225

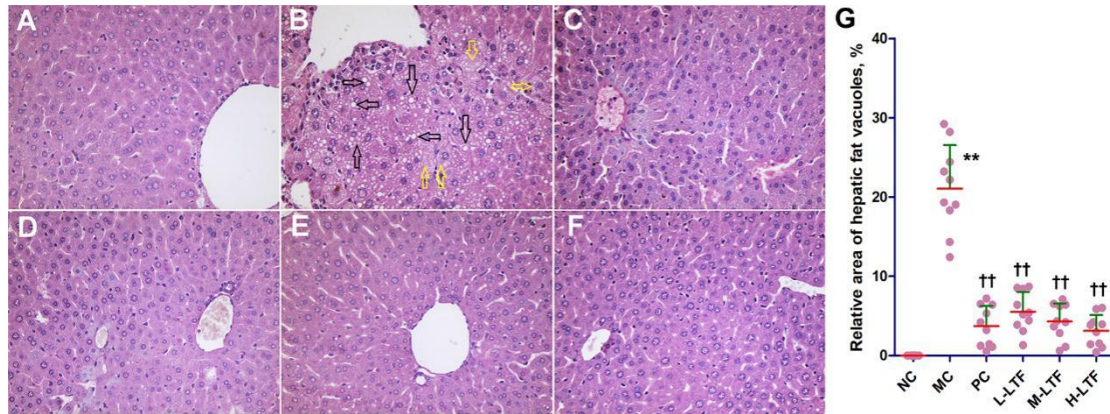

226

227 **Figure S4:** Liver histopathological section of NAFLD mice induced High-fat  
 228 emulsion. (stained with HE, 200 ×). (A) Normal control group (n=10). (B) High-fat  
 229 emulsion-induced model control group (n=10). (C) Polyene phosphatidylcholine (100  
 230 mg/kg) treatment group (n=10). (D) Low-dose (87.5 mg/kg) LTF treatment group  
 231 (n=10). (E) Medium-dose (175 mg/kg) LTF treatment group (n=10). (F) High-dose  
 232 (350 mg/kg) LTF treatment groups (n=10). (G) Relative area of hepatic fat vacuoles  
 233 of mice induced by high-fat emulsion. Relative area of hepatic fat vacuoles % = area  
 234 of hepatic fat vacuoles in every random field of liver section/ area of corresponding  
 235 field of liver section. Data is represented by mean ± SD, n=10, \* $P < 0.05$  and \*\* $P <$   
 236 0.01, compared with normal control group. † $P < 0.05$  and †† $P < 0.01$ , compared with  
 237 model control group. Black arrows refer to large fat between cells. Yellow arrows  
 238 refer to small intracellular fat.



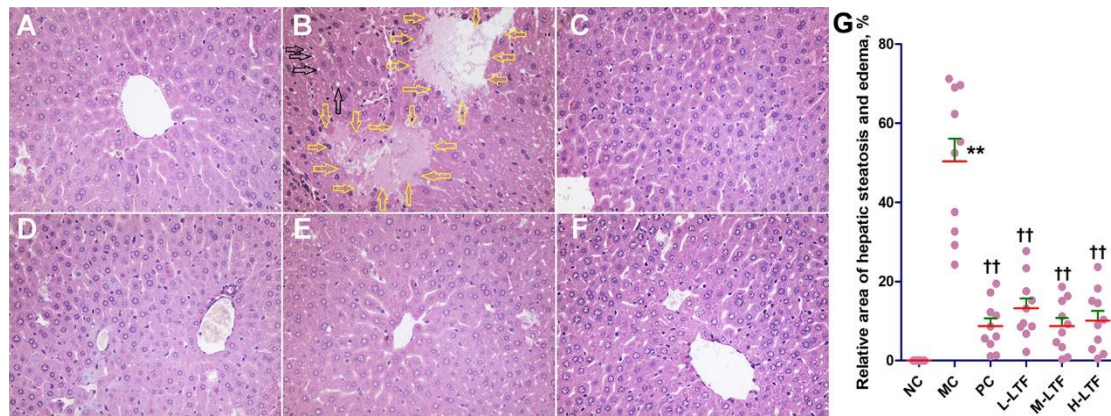

239

240 **Figure S5:** Liver histopathological section of alcoholic liver mice induced by Chinese  
 241 liquor (stained with HE, 200 ×). (A) Normal control group (n=10). (B) Chinese  
 242 liquor-induced model control group (n=10). (C) Silybin (100 mg/kg) treatment group  
 243 (n=10). (D) Low-dose (87.5 mg/kg) LTF treatment group (n=10). (E) Medium-dose  
 244 (175 mg/kg) LTF treatment group (n=10). (F) High-dose (350 mg/kg) LTF treatment  
 245 groups (n=10). (G) Relative area of hepatic steatosis and edema of mice induced by  
 246 Chinese liquor. Relative area of hepatic steatosis and edema % = area of hepatic  
 247 steatosis and edema in every random field of liver section/ area of corresponding field  
 248 of liver section. Data is represented by mean ± SD, n=10, \* $P < 0.05$  and \*\* $P < 0.01$ ,  
 249 compared with normal control group. † $P < 0.05$  and †† $P < 0.01$ , compared with model  
 250 control group. Black arrows refer to fat vacuoles. Yellow arrows refer to edema  
 251 tissues.

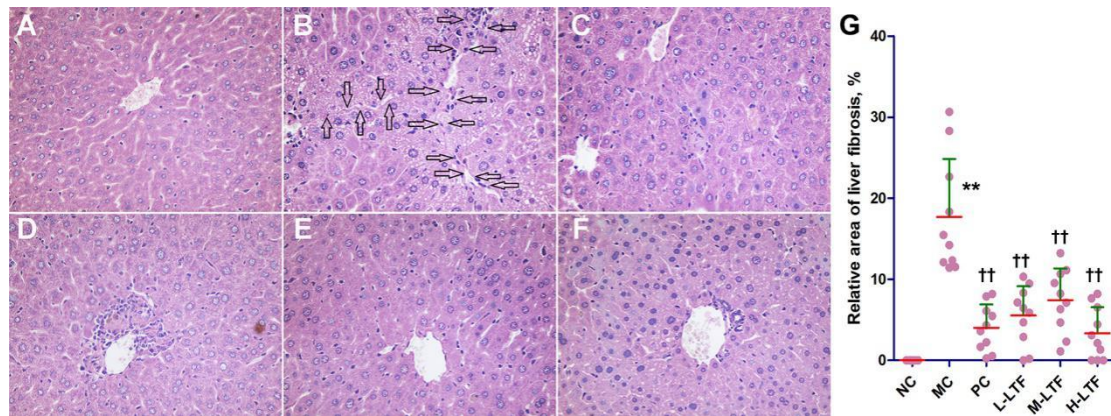

252

253 **Figure S6:** Liver histopathological section of liver fibrosis mice induced by CCl<sub>4</sub>  
 254 (stained with HE, 200 ×). (A) Normal control group (n=10). (B) CCl<sub>4</sub>-induced Model  
 255 control group (n=10). (C) Colchicine (45 mg/kg) treatment group (n=10). (D)  
 256 Low-dose (87.5 mg/kg) LTF treatment group (n=10). (E) Medium-dose (175 mg/kg)  
 257 LTF treatment group (n=10). (F) High-dose (350 mg/kg) LTF treatment groups (n=10).  
 258 (G) Relative area of liver fibrosis induced by CCl<sub>4</sub>. Relative area of liver fibrosis % =  
 259 area of liver fibrosis in every random field of liver section/ area of corresponding field  
 260 of liver section. Data is represented by mean ± SD, n=10, \**P* < 0.05 and \*\**P* < 0.01,  
 261 compared with normal control group. †*P* < 0.05 and ††*P* < 0.01, compared with model  
 262 control group. Black arrows refer to fibrosis and cell shrinkage.
